# Supplementary material for: Treatment Outcome after Fractionated Conformal Radiotherapy for Hepatocellular Carcinoma in Patients with Child-Pugh Classification B in Korea (KROG 16-05)
Source: PubMed Central journal article supplement — Cancer Res Treat. 2019 Apr 10;51(4):1589–99. doi: 10.4143/crt.2018.687 (PMC6790850; doi:10.4143/crt.2018.687), 2019-04-10
Supplement: crt-2018-687-suppl1.pdf [file crt-2018-687-suppl1.pdf]

**S1 Table.** Evaluable patients' characteristics

| Characteristic                 | No. of patients (%) |
|--------------------------------|---------------------|
| Age, median (range, yr)        | 59 (39-84)          |
| Sex                            |                     |
| Male                           | 112 (84.8)          |
| Female                         | 20 (15.2)           |
| ECOG score                     |                     |
| 0                              | 38 (28.8)           |
| 1                              | 59 (44.7)           |
| 2                              | 35 (26.5)           |
| Hepatitis                      |                     |
| No                             | 9 (6.8)             |
| HBV                            | 99 (75.0)           |
| HCV                            | 16 (12.1)           |
| Alcoholic                      | 8 (6.1)             |
| Initial CP score               |                     |
| 7                              | 81 (61.4)           |
| 8                              | 45 (34.1)           |
| 9                              | 6 (4.5)             |
| Tumor size, median (range, cm) | 5.3 (1-21)          |
| No. of tumors                  |                     |
| 1                              | 65 (49.2)           |
| 2                              | 26 (19.7)           |
| 3                              | 15 (11.4)           |
| 4                              | 4 (3.0)             |
| 5                              | 3 (2.3)             |
| 6                              | 4 (3.0)             |
| 7                              | 0 (0.0)             |
| 8                              | 2 (1.5)             |
| 9                              | 1 (0.8)             |
| ≥ 10                           | 12 (9.1)            |
| Tumor location                 |                     |
| Rt lobe                        | 82 (62.1)           |
| Lt lobe                        | 15 (11.4)           |
| Both lobes                     | 35 (26.5)           |
| Bile duct invasion             |                     |
| No                             | 104 (78.8)          |
| Yes                            | 28 (21.2)           |
| PVTT                           |                     |
| No                             | 51 (38.6)           |
| Yes                            | 81 (61.4)           |
| Main PVTT                      |                     |

|                                        |                     |
|----------------------------------------|---------------------|
| No                                     | 96 (72.7)           |
| Yes                                    | 36 (27.3)           |
| mUICC_T                                |                     |
| 1                                      | 10 (7.6)            |
| 2                                      | 19 (14.4)           |
| 3                                      | 46 (34.8)           |
| 4                                      | 57 (43.2)           |
| mUICC_N                                |                     |
| 0                                      | 115 (87.1)          |
| 1                                      | 17 (12.9)           |
| Previous treatment                     |                     |
| No                                     | 56 (42.4)           |
| Yes                                    | 76 (57.6)           |
| Combined treatment                     |                     |
| No                                     | 50 (37.9)           |
| Yes                                    | 82 (62.1)           |
| AFP, median (range, IU/mL)             | 74.4 (2.2-973140.0) |
| RT technique                           |                     |
| 3DCRT                                  | 114 (86.4)          |
| IMRT                                   | 18 (13.6)           |
| RT aim <sup>a)</sup>                   |                     |
| Curative                               | 78 (59.1)           |
| Palliative                             | 54 (40.9)           |
| Fx size, median (range, Gy)            | 2.5 (1.5-5.0)       |
| Total dose, median (range, Gy)         | 45.0 (33.0-64.0)    |
| BED, median (range, Gy <sub>10</sub> ) | 56.0 (40.4-89.6)    |
| Classic RILD                           |                     |
| No                                     | 116 (87.9)          |
| Yes                                    | 16 (12.1)           |
| Non-classic RILD                       |                     |
| No                                     | 106 (80.3)          |
| Yes                                    | 26 (19.7)           |
| Additional Treatment                   |                     |
| No                                     | 58 (43.9)           |
| Yes                                    | 74 (56.1)           |

ECOG, Eastern Cooperative Oncology Group; HBV, hepatitis B virus; HCV, hepatitis C virus; CP, Child-Pugh; PVTT, portal vein tumor thrombosis; mUICC, the modified International Union Against Cancer stage; T, tumor; N, lymph nodes; AFP,  $\alpha$ -fetoprotein; RT, radiotherapy; 3DCRT, 3-dimensional conformal radiotherapy; IMRT, intensity-modulated radiotherapy; Fx, fraction; BED, biologically effective dose when the  $\alpha/\beta$  ratio was assumed to be 10 Gy; RILD, radiation- induced liver disease. <sup>a)</sup>Curative intent means that RT field cover all viable tumors; palliative intent means that RT field cover a part of viable tumors.
