# Supplementary material for: Treatment Outcome after Fractionated Conformal Radiotherapy for Hepatocellular Carcinoma in Patients with Child-Pugh Classification B in Korea (KROG 16-05)
Source: PubMed Central journal article supplement — Cancer Res Treat. 2019 Apr 10;51(4):1589–99. doi: 10.4143/crt.2018.687 (PMC6790850; doi:10.4143/crt.2018.687), 2019-04-10
Supplement: crt-2018-687-suppl2.pdf [file crt-2018-687-suppl2.pdf]

**S2 Table.** Univariate analysis for clinical parameters affecting non-classic radiation-induced liver disease

| Clinical parameter                        | p-value |
|-------------------------------------------|---------|
| Age ( $\leq 60$ yr vs. $> 60$ yr)         | 0.712   |
| Sex (female vs. male)                     | 0.970   |
| ECOG (0 & 1 vs. 2)                        | 0.160   |
| Hepatitis (no. vs. HBV/HCV vs. alcoholic) | 0.466   |
| Liver cirrhosis (no vs. yes)              | 0.877   |
| Initial CP score (7 vs. 8 & 9)            | 0.791   |
| Tumor size ( $\leq 5$ cm vs. $> 5$ cm)    | 0.681   |
| No. of tumors (1-3 vs. $\geq 4$ )         | 0.104   |
| Tumor location (one lobe vs. both lobes)  | 0.658   |
| Bile duct invasion (no vs. yes)           | 0.077   |
| PVTT (no vs. yes)                         | 0.668   |
| mUICC_T (1 & 2 vs. 3 & 4)                 | 0.231   |
| mUICC_N (0 vs. 1)                         | 0.671   |
| Previous treatment (no vs. yes)           | 0.989   |
| Combined treatment (no vs. yes)           | 0.946   |
| RT technique (3DCRT vs. IMRT)             | 0.007   |
| RT target (all vs. partial)               | 0.111   |
| Fraction size ( $\leq 2$ Gy vs. $> 2$ Gy) | 0.252   |
| Total dose ( $44.6 \pm 7.5$ Gy)           | 0.119   |
| BED ( $57.0 \pm 9.7$ Gy <sub>10</sub> )   | 0.220   |

ECOG, Eastern Cooperative Oncology Group; HBV, hepatitis B virus; HCV, hepatitis C virus; CP, Child-Pugh; PVTT, portal vein tumor thrombosis; mUICC, the modified International Union Against Cancer stage; T, tumor; N, lymph node; RT, radiotherapy; 3DCRT, 3-dimensional conformal radiotherapy; IMRT, intensity-modulated radiotherapy; BED, biologically effective dose when the  $\alpha/\beta$  ratio was assumed to be 10 Gy.
